# Supplementary material for: Construction of the core symptom cluster management program for patients with lung cancer undergoing chemotherapy: a Delphi study
Source: Research Square preprint supplement (doi:10.21203/rs.3.rs-4437261/v1), 2024-06-10
Supplement: Supplementary file 1 [file 05da5c2c158062c896437bf7.docx]

**The core symptom cluster management program for patients with lung cancer undergoing chemotherapy**

| **NO.** | **Intervention Symptom** | **Intervention Method** | **Intervention Time** | **Intervention Content** | **Intervention Personnel** | **Intervention Place** | **Intervention Form** |
| --- | --- | --- | --- | --- | --- | --- | --- |
| 1 | The core symptom cluster (The fatigue-pain-sleep disturbance symptom cluster) | Intervention training | Conducting 2 weeks of training before the intervention, once a week, 40min/ time. | (1) Intervention implementors should continuously improve their knowledge and skills in core symptom cluster management to guide patients in core symptom cluster management and timely identification of situations requiring consultation. (2) The researchers provide courseware and training materials related to the core symptom cluster of patients with lung cancer undergoing chemotherapy while carrying out offline intensive training. Before each training, they should investigate whether the intervention implementers could participate in offline intensive training and provide the intervention implementers who could not participate in offline intensive training with Tencent conference links or replay links and electronic courseware and training materials. After the second week of training, the training content assessment will be conducted. The assessment questions are 20 multiple-choice questions and 10 judgment questions, each choice question is 4 points, each judgment question is 2 points, and 60 points are passed. If the intervention assessment fails, the make-up examination will be arranged at the same time the next day. (3) The offline intervention seminar will be held on the Tuesday afternoon of the last week of each month to discuss the problems and solutions during the intervention of this month. If intervention implementors cannot attend, they will submit the problems in electronic form and discuss them with the researchers online. If the problems are still unresolved, they will have a separate discussion with the researchers at another time. | researchers | Medical oncology conference room | Offline centralized training, online auxiliary training  Offline: PPT, Symptom Management Manual (Implemented version),  list of intervention evaluation criteria, division of responsibilities  Online: Questionnaire star test paper |

|  |  |  | Week 1  (Tuesday) | Training topics: The concept, mechanism, causes, effects, management status of symptom clusters and the core symptom cluster in lung cancer patients, and the significance of carrying out this study. |  |  |  |
| --- | --- | --- | --- | --- | --- | --- | --- |
| Week 2  (Tuesday) | Training topics: Interpretation of intervention plan for the core symptom cluster of patients with lung cancer chemotherapy, training of intervention and evaluation criteria, division of intervention responsibilities. |
| 2 | The core symptom cluster | Focus evaluation | Period of hospitalization | Using communication skills to communicate with patients, close the distance with patients, and gain patient trust, researchers ask patients in detail about symptoms, and encourage patients to express real: including the nature of fatigue; The location, intensity, and nature of the pain; The characteristics of sleep disturbance and their duration, inducing or mitigating factors, interference degree, etc. The Brief Fatigue Inventory (BFI), the Brief Pain Inventory (BPI), and the Pittsburgh Sleep Quality Index (PSQI) are used to assess the patient's symptoms quantitatively. | researchers | ward | Offline: Paper version of the assessment scale |
| 3 | The core symptom cluster | Health education | Period of hospitalization | With TEACH-BACK as the theoretical guidance, patients are given health guidance on the core symptom cluster to ensure that patients fully understand the relevant content. Distribute the core symptom cluster management manual (patient edition) to patients, and conduct health education for patients based on the manual, including the concept, cause, impact, non-drug management, etc.; The relevant content will be made into graphics, videos, and other popular science materials and uploaded to the patient's WeChat group for the patient to watch at any time, and remind the patient who has completed the study of popular science materials to punch in the WeChat group. | researchers | ward | Offline, online support  Offline: Symptom Management Manual (Patient Edition) |

|  |  |  | Period of hospitalization | According to the patient's core symptom cluster, combined with the patient's lifestyle, such as diet, sleep, exercise, and other bad habits, targeted health guidance for patients. The focus of health guidance is adjusted according to the results of each patient's symptom assessment. |  |  | Online: graphic, video, WeChat |
| --- | --- | --- | --- | --- | --- | --- | --- |
| 4 | The core symptom cluster | Diet nursing | / | The dietary principles are as follows: The daily energy requirement of patients is calculated according to the Harris-Benedict formula, which is 30kcal/ (kg·d), protein intake is 1.2-2g/(kg·d), total daily energy is calculated = standard body weight × physical labor coefficient, and the recommended intake ratio for patients is as follows: Carbohydrate 30 ~ 50%, protein 15 ~ 30%, fat 25 ~ 40%, the total energy distribution throughout the day: breakfast 30%, lunch 40%, dinner 30%. If the patient still has insufficient energy intake through the mouth after dietary guidance, consult with the doctor to give oral nutritional supplements (ONS) or supplementary parenteral nutrition. Patients who are unable to eat are given parenteral nutrition after consultation with their doctor. Patients can also be advised to increase their anti-inflammatory diet, such as whole grains, vegetables, and low-added sugar, to reduce the body's inflammatory response. | Nutrition specialist nurses | / | / |
| Period of hospitalization | According to the patient's wishes, the hospital nutrition set, the recipe meal jointly prepared by the patient and the nutrition specialist nurse, or the meal prepared by the patient and submitted to the nutrition specialist nurse for review. | ward | Offline: face to face |
| Period of home | According to the meal plan developed jointly with the nutrition nurse, the patient makes the recipe meal and submits it to the nutrition nurse for review. | home | Online: WeChat consultation |
| 5 | The core symptom cluster | Psychological nursing | / | If the responsible nurse finds that the patient may have psychological problems (DT psychological pain thermometer ≥4 points), the responsible nurse will conduct psychological counseling, and then ask the psychological specialist nurse for consultation after the failure. The intervention content includes cognitive behavioral therapy, mindfulness therapy, narrative therapy, etc. The intervention method can be selected according to the patient's preference. | Psychological specialist nurses | / | / |
| Period of hospitalization | The psychotherapist played the training video of cognitive behavioral therapy and mindfulness therapy for the patient, and led the patient to complete the whole training process, emphasizing the precautions in it. Issue a core symptom cluster management journal to patients and encourage them to keep a symptom journal promptly, at least once a week. | ward | Offline: face to face |
| Period of home | The patients practiced according to the cognitive behavioral therapy, mindfulness therapy, and training videos uploaded in the WeChat group, and kept a diary of symptoms. | home | Online: video |
| 6 | The core symptom cluster | Exercise intervention | / | After excluding exercise contraindications, a personalized exercise plan was developed according to the evaluation results, and the exercise plan was gradually increased from low intensity and low duration for those who had no exercise habits, and modified according to the changes of the disease. Exercise time should be 1h after breakfast or dinner. Each exercise can be gradually increased from 10min to 20min to 30min to 40min, 5 days a week or more; If there is chest tightness, nausea and vomiting, lower limb pain, irregular pulse, and other conditions during exercise, the activity should be stopped immediately; If you have any doubts about sports, you can consult the researcher through offline face-to-face or online WeChat group; During the interchemotherapy period, patients can supervise WeChat group punch card. | researchers | / | / |
| Period of hospitalization | Patients with BFI ≤ 7 are recommended to do the Baduanjin exercise. Researchers will practice the eight Duan Jin in the department at 20:30 every day. The eight Duan Jin adopts the 12-minute command version published by the General Administration of Sport of China. Left and right bow like shooting eagle; Regulate the spleen and stomach must be single lift; Look back; Head wagging tail to heart fire; Both hands to strengthen the kidney waist; Save fists angry eyes increase strength; All kinds of diseases go away in the back. Practice twice each time.  **If the patient can not tolerate the conventional Baduanjin training, then practice simple sitting Baduanjin or Simiao Sun health exercises, specifically: hair often combed, eyes transported, teeth often knocked, gargling jade jin, eardrum, face often washed, head often shake, waist swing, the abdomen often knead, valley road, knee twist, walk, often rub feet. Do this at least twice a day.**  **After the exercise is complete, perform a regular stretching exercise, which includes: neck stretch - cross your hands on your lower back, tuck in your stomach and sink your shoulders, straighten your back, tilt your head back, and feel the sternocleidomastoid muscle elongated. Simultaneous lateral bending and rotation of the head can increase tensile strength. Chest stretch - standing position, chest out, stomach in, fingers interlocked; Place your hands on top of your head; Contract your back muscles and pull your elbows back towards each other. Shoulder stretch - Stand with your feet shoulder-width apart, toes facing forward. Wrap your hands around your shoulders as if you were hugging yourself. Place your arms in the most comfortable position and pull your shoulders forward. Backstretch - Straighten your arms, push your hips back, put your back in a straight position, bend your knees slightly, sink** | ward | Offline: face to face |
|  | **your shoulders, and keep pushing. Stretch hold for 30 ~ 60 s. Each stretch can be repeated 2 to 4 times; It is recommended that the cumulative time of each stretch is 60 s.**  **After the completion of the exercise and breathing relaxation training: breathing exercises include calm breathing, standing inhalation, and forward exhalation; Lift the upper arms to inhale, press the abdomen with both hands to exhale; Lift your upper limbs to inhale and lower your arms to exhale; Reach the upper limbs to inhale, press the abdomen with both hands to exhale; Hold your head to inhale, rotate to exhale; Inhale by lifting the upper limb in standing position, exhale by squatting position; Abdominal lip contraction respiration; Breathe calmly. It is recommended that patients do respiratory exercises twice a day for 5 ~ 10min each time.** |  |  |
| Period of home | **Patients choose the following exercise methods according to their wishes.**  **Video with the practice of Baduanjin/simple sitting Baduanjin/Simiao Sun health exercise, the specific same as above, 10 ~ 20min/ time, 1 ~ 2 times/day.**  **Walking, jogging, climbing stairs, cycling, dancing, swimming, etc., 20 ~ 40min/ time, once/day.**  **After the completion of the exercise, the regular stretching exercise and breathing relaxation training are in the form of video training, as above.** | home | Online: video |

| 7 | The core symptom cluster | TCM intervention | / | **For the core symptom cluster of patients, traditional Chinese medicine intervention methods can be selected, including auricular point pressure, acupressure, and wrist and ankle acupuncture. During the hospitalization of chemotherapy patients, traditional Chinese medicine specialist nurses will perform traditional Chinese medicine intervention on patients, teach patients acupressure methods before discharge, and perform acupressure at home by themselves. Any questions about acupressure can be consulted by researchers through an online WeChat group.** | TCM specialist nurses | / | / |
| --- | --- | --- | --- | --- | --- | --- | --- |
| Period of hospitalization | **Auricular point sticking: The specialist nurse of traditional Chinese medicine examines the skin of the patient's auricle, determines the reaction point of the acupoint "obtaining qi" with the probe, disinfects the auricle skin, and applies the adhesive cloth with Wang Fuxing seeds to the auricle acupoints. Acupoints include sympathetic (at the junction of the lower foot of the opposite earring and the inner side of the opposite earring), God gate (outside 1/3 of the triangular fossa, before the intersection of the upper and lower foot of the opposite earring), under the cortex (on the inner side of the tragus), lung area (on the upper and lower outer three sides of the heart point), and bronchus (at the center of the ear fossa). When the patient feels the pain of acid swelling and heat in the ear, it is appropriate to press, 30 ~ 60s/ time per point, 3-5 times/day, replace the application once every 3 days, and alternate the left and right ears. Inform the patient not to rub the ear patch when pressing, and remove it if loosening, displacement, redness, or allergies occur.**  **Acupressure: Before the massage, the patient was told to empty the bladder to the finger abdomen by rubbing A is the point (to the pain is Shu, that is, people often say "there is pain is the point"), Yangchi point (located in the** | ward | Offline: face to face |
|  | **back of the wrist, the depression of the total extensor tendon ulnar edge), Neiguan point (the palm of the forearm, when Quze and Da Ling on the line, the wrist on the 2 inches, between the palm tendon and the radial wrist flexor tendon), Zusanli point (the lateral leg, 3 inches below the calf nose, a cross finger outside the tibial anterior crest, on the line between the calf nose and Xie Xi), Yongquan point (the bottom of the foot, the depression in the front of the foot when curled, about the intersection point of the first 1/3 and the last 2/3 of the line between the foot and the heel of the second and third plantar toe seam seam), Shangxing point (the head of the human body, the current hairline is 1 inch straight up), massage 3 ~ 5min per point, 2 times/day, The pressure should be applied so that the nail color changes from red to white when pressed.**  **Wrist and ankle acupuncture: The whole process is evaluated and operated.** |  |  |
| Period of home | **Auricular point sticking:** the patient will replace the new ear stickers before discharge, and remove the ear stickers after 3 days of self-pressing concerning the ear point sticking and training video. The selection of acupoints and massage requirements are the same as above.  Acupressure: Patients use acupressure and practice video as a reference for acupressure. The selection of acupressure points and massage requirements are the same as above. | home | Online: video |
| 8 | Fatigue | Energy-saving tips | Period of hospitalization / Period of home | Teach patients to use energy-saving techniques as follows:  Planning a reasonable daily schedule;  Engage in physical activity or regular exercise when you are most energetic, such as in the morning;  Use energy-saving principles and AIDS, such as wearing a bathrobe instead of a towel to dry after a bath;  To delegate to someone else;  Put off unnecessary things. | researchers | ward / home | Offline: face to face  Online: WeChat |
| 9 | Pain | Life nursing | Period of hospitalization/ Period of home | Patients with pain often sweat, physical and mental fatigue, and their self-care ability decreased, should help patients to keep clean clothes, clean mouth, smooth skin, nutrition balance, etc.  Conventional pain medication may lead to constipation. Patients should be advised to drink more water, eat more vegetables and fruits rich in dietary fiber, such as kiwi, prune, dragon fruit, etc., and massage the abdomen clockwise 15 minutes after meals for 15 minutes each time. If the patient's constipation does not relieve, inform the doctor to take medication.  Inform and teach patients about ways to distract themselves from pain, such as listening to their favorite music, watching videos that interest them, chatting with others, etc. | researchers | ward / home | Offline: face to face  Online: WeChat |
| 10 | Sleep disturbance | Environmental nursing | Period of hospitalization | Control the temperature (18℃ ~ 22℃) and humidity (50% ~ 60%) in the ward within the appropriate range, and open the window regularly for ventilation for 30 minutes/ day to create a good ward environment for patients. Put up warm signs and provide soundproof earplugs and eye masks in the ward to remind patients to keep a good rest and rest. Medical workers should pay attention to controlling the amplitude of movement during ward rounds and nursing operations, reduce nursing operations as much as possible at night, and avoid talking loudly, so as not to affect the rest of patients. | researchers | ward / home | Offline: face to face |
| 11 | Sleep disturbance | Sleep hygiene | Period of hospitalization/ Period of home | Stimulation control: Instruct patients to maintain a regular bedtime and wake-up time each day; Patients are advised to rest only in bed and avoid working and eating in bed; It is recommended that patients contact light (≥1250 ~ 10000 lux) or sunlight for 30 ~ 90min after morning, and reduce exposure to strong light (such as computer, mobile phone screen and light source close to the eyes, etc.) before going to bed and at night; If you wake up in the middle of the night, do not look at the clock, such as a long time (about 30 minutes) it is difficult to recover sleep, it is recommended to leave the room and return to the room when sleepy.  Sleep restriction: Inform the patient to control the sleep time during the day (no more than 30 minutes) to avoid long sleep during the day affecting the quality of sleep at night.  At dinner time, patients should be provided with a light diet, reminded patients not to drink caffeinated beverages, strong tea, or smoking before going to bed, drink warm milk to help sleep, but limit liquid intake 3 hours before going to bed.  Inform the patient to pay attention to calming emotions, avoid being too excited at night to fall asleep, avoid moderate to vigorous physical activity, and do some pleasant and relaxing things before going to bed, such as meditation, mindfulness, stretching, reading, hot feet, etc., to help fall asleep.  Alpha brain wave music to help sleep: If the patient has insomnia, click the audio pushed within the WeChat group, which helps the secretion of endorphins in the patient's brain and improves sleep. | researchers | ward / home | Offline: face to face  Online: WeChat |
| 12 | The core symptom cluster | follow-up | Period of home | Keep in touch with patients through WeChat follow-up, evaluate the effect of symptom management, guide, encourage, and urge patients to adhere to core symptom cluster management, develop the habit of completing the evaluation questionnaire in the core symptom cluster management manual (patient edition) on the 7th day after chemotherapy, write symptom diary, strengthen diet, psychological, exercise and other guidance, and encourage patients to consult WeChat in time if they have any questions. Questions raised by patients were answered, follow-up records were made, and the frequency of follow-up was 1 time /1 chemotherapy cycle (21 days). | researchers | home | Online: WeChat |
