# Supplementary material for: Construction of the core symptom cluster management program for patients with lung cancer undergoing chemotherapy: a Delphi study
Source: Research Square preprint supplement (doi:10.21203/rs.3.rs-4437261/v1), 2024-06-10
Supplement: Supplementary file 2 [file 9edeeb845f9650ceccdd7e26.docx]

**The second round of expert correspondence questionnaire for CSCMP**

Dear expert,

On behalf of the research team, I would like to extend to you the most heartfelt thanks and the highest respect. Thank you for your valuable input in the first round of Delphi expert consultation. We are honored and grateful for the tremendous value that your expertise and experience add to our research programs.

Under the guidance of the experts, we carefully analyzed and revised the results of the 17 Delphi expert consultations received in the first round to ensure that the final intervention plan is more detailed and complete. In this process, we deeply appreciate the importance of your participation in this project. Thanks to your support and advice, we can continuously improve our interventions to make them more realistic and feasible. To further enhance the quality and credibility of the intervention, we present to you the second round of Delphi expert consultation. We are sincerely looking forward to receiving your valuable guidance again. Your professional insights will once again provide important guidance for the intervention program of this study, and your participation and contribution will once again play an irreplaceable role.

Please try your best to feedback on your consultation before January 13, thank you!

If you have any questions about this questionnaire, please send an email to 15333481217@163.com. Thank you very much for your guidance and help.

Sincerely wish: work success, health!

Tutor: Lili Zhang Professor

Graduate student: Le Zhang

Please score according to your own professional knowledge and practice experience by the importance: 1 is very unimportant, and 5 is very important. The higher the score, the more important the item. Please score the importance of each item and determine whether to include clinical intervention in the end and mark "×" in the corresponding "" to indicate your choice. If you have other valuable suggestions, please fill in the "Supplementary Suggestions" box. If you need to modify the place, please fill in the "Modification Suggestion box", thank you again for your patient guidance!

| **Intervention Symptom** | **Intervention Method** | **NO.** | **Intervention Time** | **Intervention Content** | | **Intervention Personnel** | **Intervention Place** | **Intervention Form** |
| --- | --- | --- | --- | --- | --- | --- | --- | --- |
| The core symptom cluster (The fatigue-pain-sleep disturbance symptom cluster) | Intervention training | 1 | Training lasting for two weeks before the intervention begins, once a week, for 40 minutes each session. | Intervention implementers should continuously enhance their knowledge and skills in managing core symptom cluster to effectively guide patients and promptly identify patients requiring Multidisciplinary Consultation. Researchers provide educational materials and training sessions on core symptom cluster in patients with lung cancer undergoing chemotherapy. Prior to each training session, implementers are surveyed to determine their availability for in-person training. For those unable to attend, a Tencent meeting link or playback link, along with electronic versions of the materials, is provided. After the training, an assessment is conducted. Those who do not pass must retake the exam. | | Researchers | Oncology Department Conference Room | Offline Concentrated Training, Online Individual Learning |
| Week 1 | Training topic: concepts, mechanisms, impacts, and current management of core symptom cluster in patients with lung cancer. | | PowerPoint |
| Week 2 | Training Topic: concepts, causes, impacts, and current treatment and care of core symptom cluster in patients with lung cancer. | | PowerPoint |
| Week 3 | Training topic: concept, mechanism, causes, implications, and management status of symptom clusters and core symptom cluster in patients with lung cancer, as well as the significance of this Study. | | PowerPoint, Symptom Management Handbook (Implementer Version) |
| Week 4 | Training topic: clearly define the division of responsibilities and conduct assessments of the training content. | | Responsibilities Distribution Table, Questionnaire Star Assessment Paper |
| Importance: 1 2 3 4 5 | | | | | Clinical usability: Yes No | | | |
| Supplementary Suggestions: | | | | | | | | |
| Modification suggestion: | | | | | | | | |
| The core symptom cluster (The fatigue-pain-sleep disturbance symptom cluster) | Key Assessment | 2 | Upon Admission | The researchers employ communication skills to engage with patients, establish rapport, and gain their trust. Detailed inquiries are made regarding the patients' symptoms, encouraging them to express themselves truthfully. This includes the nature of fatigue, the location and intensity of pain, and characteristics of sleep disturbances, as well as the duration, triggering or alleviating factors, and level of interference of these symptoms. Quantitative assessments of the patients' symptoms are conducted using the Brief Fatigue Inventory (BFI), Brief Pain Inventory (BPI), and Pittsburgh Sleep Quality Index (PSQI). During interactions with patients, carefully observe their physical condition, such as nutritional status, facial expressions, body posture, forced positions, and level of consciousness. | | Researchers | Oncology Ward | Offline: Paper-based assessment scales |
| Importance: 1 2 3 4 5 | | | | | Clinical usability: Yes No | | | |
| Supplementary Suggestions: | | | | | | | | |
| Modification suggestion: | | | | | | | | |
| The core symptom cluster (The fatigue-pain-sleep disturbance symptom cluster) | Health Guidance | 3 | Upon Admission | Guided by the theory of Feedback Education (TEACH-BACK), provide health guidance on core symptom cluster to patients, ensuring their full understanding of the relevant content. Distribute a core symptom cluster management manual (patient version) to patients and provide health guidance based on the manual. The content includes the concept, causes, effects, and non-pharmacological management (diet, psychology, exercise, traditional chinese medicine, etc.) of core symptom cluster. Produce related materials such as graphics, videos, etc., and upload them to the WeChat group 2 where patients are located for them to view at any time. | | Researchers | Oncology Ward | Mainly Offline, Assisted Online  Offline: Symptom Management Manual (Patient Version)  Online: Educational Videos |
| 4 | Based on the patient's core symptom cluster and considering their lifestyle factors such as diet, sleep, exercise, and other unhealthy habits, provide targeted health guidance to the patient. Health guidance adapts dynamically to changes in the patient's symptomatology. | |
| Importance: 1 2 3 4 5 | | | | | Clinical usability: Yes No | | | |
| Supplementary Suggestions: | | | | | | | | |
| Modification suggestion: | | | | | | | | |
| The core symptom cluster (The fatigue-pain-sleep disturbance symptom cluster) | Dietary Care | 5 | Chemotherapy Period, Chemotherapy Interval | According to the Harris-Benedict formula, calculate the patient's daily energy requirement, specifically: 30kcal/(kg·d). Protein intake should be 1.2 to 2g/(kg·d). Calculate the total daily energy as follows: Standard body weight × Physical activity coefficient. It is recommended that patients consume the following proportions: Carbohydrates 30-50%, Protein 15-30%, Fat 25-40%. The distribution of total daily energy should be as follows: Breakfast 30%, Lunch 40%, Dinner 30%. If the patient's oral intake of energy remains insufficient after dietary guidance, consult with the physician to consider oral nutritional supplements (ONS) or supplementary parenteral nutrition. For patients unable to eat orally, consult with the physician to provide parenteral nutrition. | | Nutrition specialist nurses | Oncology Ward and Patient's Residence | Combining Offline and Online Components |
| 6 | Chemotherapy Period | According to the patient's preference, they can choose either hospital-provided nutritional meals or collaborate with a nutrition specialized nurse to develop a personalized meal plan prepared by the patient themselves. | | Oncology Ward | Offline: face-to-face |
| 7 | Chemotherapy Interval | According to the jointly devised dietary plan with the nutrition specialist nurse, patients independently prepare recipe meals and submit them for review by the nutrition specialist nurse. | | Patient's Residence | Online: WeChat Consultation |
| Importance: 1 2 3 4 5 | | | | | Clinical usability: Yes No | | | |
| Supplementary Suggestions: | | | | | | | | |
| Modification suggestion: | | | | | | | | |
| The core symptom cluster (The fatigue-pain-sleep disturbance symptom cluster) | Psychological care | 8 | Chemotherapy Period | If the primary nurse identifies potential psychological issues in the patient, the psychological specialist nurse conducts psychological counseling. Intervention may involve cognitive-behavioral therapy, mindfulness therapy, narrative therapy, etc. | | Psychiatric Specialist Nurses | Oncology Ward and Patient's Residence | Combining Offline and Online Components |
| 9 | Chemotherapy Period | The psychological specialist nurse plays cognitive-behavioral therapy and mindfulness therapy practice videos for the patient and guides them through the entire practice process, emphasizing key points. Patients are provided with symptom management diaries, encouraging them to promptly record their fatigue, pain, and sleep disturbance symptoms. | | Oncology ward | Offline: face-to-face, educational videos |
| 10 | Chemotherapy Interval | Patients independently practice cognitive-behavioral therapy and mindfulness therapy exercises based on videos uploaded to the WeChat group, maintaining a daily routine of recording symptom diaries. | | Patient's Residence | Online: Educational Videos |
| Importance: 1 2 3 4 5 | | | | | Clinical usability: Yes No | | | |
| Supplementary Suggestions: | | | | | | | | |
| Modification suggestion: | | | | | | | | |
| The core symptom cluster (The fatigue-pain-sleep disturbance symptom cluster) | Exercise intervention | 11 | Chemotherapy Period, Chemotherapy Interval | Exercise should be performed 1 hour after breakfast or dinner. Duration can start from 10 to 20 minutes, gradually increasing to 30 to 40 minutes, at least 5 days per week. If symptoms like chest tightness, nausea, vomiting, leg pain, or irregular pulse occur during exercise, the activity should be stopped immediately. Any doubts about exercise can be addressed by consulting the researcher either in-person or via the online WeChat group. During chemotherapy intervals when patients are at home, exercise adherence can be monitored through the WeChat group's check-in feature. | | Researchers | Oncology Ward and Patient's Residence | Combining Offline and Online Components |
| 12 | Chemotherapy Period | Give patients guidance on the Baduanjin Qigong exercises 1-2 times. When the BFI score is ≤7, recommend the Baduanjin, led by the researcher daily at 20:30 in the department. The Baduanjin should follow the 12-minute command version published by the General Administration of Sport of China, including exercises such as "Holding Up the Heavens with Two Hands," "Drawing the Bow to Shoot the Eagle," "Raising Single Hand to Regulate the Spleen and Stomach," and so on, performed twice each session.  If patients cannot tolerate regular Baduanjin, they can practice simplified seated Baduanjin or Sun Simiao's health-preserving exercises, including actions like "Combing Hair Regularly," "Exercising Eyes Regularly," "Knocking Teeth Regularly," "Rinsing Oral Cavity with Saliva Regularly," "Drumming Ears Regularly," "Washing Face Regularly," "Shaking Head Regularly," "Swinging Waist Regularly," "Massaging Abdomen Regularly," "Regulating the Valley Regularly," "Twisting Knees Regularly," "Walking Regularly," and "Rubbing Feet Regularly." These should be completed at least twice daily.  After exercise, perform regular stretching exercises, including neck stretches, chest stretches, shoulder stretches, and back stretches, each held for 30-60 seconds and repeated 2-4 times, accumulating to 60 seconds per stretch. Then, engage in relaxation training through breathing exercises, including calm breathing, standing inhalation, forward bending exhalation, and other techniques, recommended to be performed twice daily for 5-10 minutes each time. | | Oncology ward | Offline: face-to-face |
| 13 | Chemotherapy Period | Patients can choose from the following exercise options based on their preferences:  Video-guided Baduanjin/Sun Simiao's health-preserving exercises, following the same routine as previously described, for 10-20 minutes per session, 1-2 times per day.  Walking, jogging, stair climbing, cycling, dancing, swimming, etc., for 20-40 minutes per session, once a day.  After completing exercise, engage in regular stretching exercises and relaxation training through video-guided sessions, following the same routine as described earlier. | | Patient's Residence | Online: Educational Videos |
| Importance: 1 2 3 4 5 | | | | | Clinical usability: Yes No | | | |
| Supplementary Suggestions: | | | | | | | | |
| Modification suggestion: | | | | | | | | |
| The core symptom cluster (The fatigue-pain-sleep disturbance symptom cluster) | Traditional Chinese Medicine Intervention | 14 | Chemotherapy Period, Chemotherapy Interval | For addressing the patient's core symptom cluster, traditional Chinese medicine interventions may include auricular acupressure, acupoint massage, etc. During hospitalization, patients undergoing chemotherapy are subjected to traditional Chinese medicine interventions by Specialized Traditional Chinese Medicine (TCM) Nurses. Before discharge, patients are instructed in acupoint massage techniques, which they can then perform at home during their recovery period. Any questions regarding acupoint massage can be addressed to researchers through online WeChat group. | | Specialized Traditional Chinese Medicine Nurses | Oncology Ward and Patient's Residence | Combining Offline and Online Components |
| 15 | Chemotherapy Period | For auricular acupressure, TCM nurses conduct an examination of the patient's auricular skin, use a probe to identify the "qi-responsive" points, disinfect the auricular skin, and apply adhesive tape containing vaccaria seeds to the ear acupoints. The acupoints include: sympathetic (at the junction of the lower foot of the helix and the inner side of the helix), shenmen (outer 1/3 of the triangular fossa, in front of the crossing of the upper and lower foot of the helix), subcortex (inner side of the tragus), lung area (upper and lower outer three sides of the heart acupoint), and bronchus (central part of the ear fossa). Pressure should be applied until the patient feels a sore, warm, and painful sensation in the ear, for 30-60 seconds per point, 3-5 times a day, with the adhesive tape changed every 3 days, alternating between the left and right ears. Patients should be advised not to rub the ear during pressing, and if loosening, displacement, redness, or allergy occurs, the ear patch should be removed.  For acupoint acupressure, patients are instructed to empty their bladder before acupoint acupressure. The following acupoints are massaged with finger pads: Baihui (located at the top of the head, 5 cun directly above the midpoint of the anterior hairline), Hegu (on the back of the hand, between the first and second metacarpal bones, at the midpoint of the radial side of the second metacarpal bone), Pishu (located on the back, below the spinous process of the 11th thoracic vertebra, 1.5 cun lateral), Ganshu (on the back, below the spinous process of the 9th thoracic vertebra, 1.5 cun lateral), Shenshu (on the back, below the spinous process of the 2nd lumbar vertebra, 1.5 cun lateral), Zusanli (located on the lateral side of the lower leg, 3 cun below Dubi, on the line connecting Dubi and Jiexi. Dubi is at the lateral edge of the patellar ligament, and Jiexi is in the central depression of the horizontal crease at the dorsum of the foot and the lower leg junction), Sanyinjiao (on the medial side of the lower leg, 3 cun above the tip of the medial malleolus, posterior to the medial border of the tibia), Guanyuan (on the lower abdomen, on the midline, 3 cun below the umbilicus), Taichong (located on the dorsum of the foot, in the depression proximal to the junction of the first and second metatarsal bones), Shenmen (located on the wrist, at the ulnar end of the transverse crease on the palmar side, in the depression on the radial side of the tendon of the flexor carpi ulnaris), Anmian (located at the midpoint of the line connecting Yifeng and Fengchi. Yifeng is located on the neck, in the depression anterior to the lower end of the mastoid process behind the earlobe; Fengchi is in the depression between the upper end of the sternocleidomastoid and the trapezius muscles), Zhaohai (located in the ankle region, 1 cun below the tip of the medial malleolus, in the depression on the lower edge of the medial malleolus), Shenmai (in the depression directly below the lateral malleolus), Sishencong (located on the top of the head, 1 cun anterior, posterior, and lateral to Baihui, totaling four points), Yintang (located between the eyebrows). Each point is massaged for 3-5 minutes, twice a day, with the pressure adjusted so that the color of the nail turns from red to white during pressing. | | Oncology ward | Offline: face-to-face |
| 16 | Chemotherapy Interval | For auricular acupressure: Before discharge, patients are provided with new ear patches. They are instructed to refer to the auricular acupressure follow-along video for self-pressing for 3 days and then remove the ear patches. The selection of acupoints and acupressure requirements remain the same.  Acupoint acupressure: Patients refer to the acupoint massage follow-along video for guidance on acupoint acupressure. The selection of acupoints requirements remain the same. | | Patient's residence | Online: Educational Videos and WeChat Consultation |
| Importance: 1 2 3 4 5 | | | | | Clinical usability: Yes No | | | |
| Supplementary Suggestions: | | | | | | | | |
| Modification suggestion: | | | | | | | | |
| Fatigue | Energy-Saving Techniques | 17 | Chemotherapy Period, Chemotherapy Interval | Teaching patients to use energy-saving techniques involves the following:  1. Establishing a well-structured daily routine.  2. Engaging in physical activities or regular exercises during times of peak energy, such as in the morning.  3. Applying energy-saving principles and utilizing assistive devices, such as wearing a bathrobe after showering instead of drying off with towels.  4. Delegating tasks to others whenever possible.  5. Delaying unnecessary tasks. | | Researchers | Oncology Ward and Patient's Residence | Offline: Face-to-face  Online: WeChat Consultation |
| Importance: 1 2 3 4 5 | | | | | Clinical usability: Yes No | | | |
| Supplementary Suggestions: | | | | | | | | |
| Modification suggestion: | | | | | | | | |
| Pain | Life care | 18 | Chemotherapy Period, Chemotherapy Interval | When experiencing pain, patients often sweat profusely, feel physically and mentally exhausted, and may have a decline in their ability to perform daily activities. It is important to ensure that patients have clean and tidy clothing, maintain oral hygiene, keep their skin smooth, and maintain a balanced diet.  Routine pain medication may cause constipation in patients. Patients should be advised to drink plenty of water, consume fruits and vegetables rich in dietary fiber, and massage their abdomen clockwise for 15 minutes after meals, repeating the massage each time for 15 minutes.  Patients should be informed and taught methods to distract themselves from pain, such as listening to their favorite music, watching interesting videos, or engaging in conversations with others. | | Researchers | Oncology Ward and Patient's Residence | Offline: Face-to-face  Online: WeChat Consultation |
| Importance: 1 2 3 4 5 | | | | | Clinical usability: Yes No | | | |
| Supplementary Suggestions: | | | | | | | | |
| Modification suggestion: | | | | | | | | |
| Sleep disturbance | Environmental Care | 19 | Chemotherapy Period | To provide a conducive environment for patients, it's essential to maintain the temperature in the ward between 18°C to 20°C and humidity between 50% to 60%. Regular ventilation by opening windows should be conducted to ensure fresh air circulation. Posting comforting messages within the ward can help encourage patients to maintain good sleep patterns. Healthcare providers should be mindful of their actions during rounds and nursing procedures, minimizing noise and movements during nighttime to avoid disrupting patients' rest. | | Researchers | Oncology ward | Offline: face-to-face |
| Importance: 1 2 3 4 5 | | | | | Clinical usability: Yes No | | | |
| Supplementary Suggestions: | | | | | | | | |
| Modification suggestion: | | | | | | | | |
| Sleep disturbance | Sleep Hygiene | 20 | Chemotherapy Period, Chemotherapy Interval | Stimulus Control: Patients are instructed to maintain a regular sleep and wake schedule daily. They are advised to use the bed only for rest and avoid working or eating in bed. Patients are encouraged to expose themselves to light (≥1250–10000 lux) or sunlight for 30 to 90 minutes after waking up, and to reduce exposure to bright light (such as computer screens, smartphones, and light sources near the eyes) before bedtime and during the night. If they wake up in the middle of the night, they are advised not to check the time. If they have difficulty falling back asleep for an extended period (about 30 minutes), they are advised to leave the room and return when they feel sleepy.  Sleep Restriction: Patients are informed to limit daytime naps to no more than 30 minutes to avoid affecting nighttime sleep quality.  For dinner, patients should be provided with a light meal. They are reminded not to consume caffeinated beverages, strong tea, or smoke before bedtime. Drinking warm milk may aid sleep, but fluid intake should be restricted three hours before bedtime.  Patients are advised to manage their emotions and avoid excessive excitement at night, which may hinder sleep onset. They are also advised to refrain from moderate to vigorous physical activity before bedtime and engage in pleasant and relaxing activities such as meditation, mindfulness, stretching, reading, or soaking feet in warm water to help induce sleep.  Alpha brainwave music for sleep: If patients experience insomnia, they can listen to audio files provided in the WeChat group, which may stimulate the secretion of endorphins in the brain and improve sleep quality. | | Researchers | Oncology Ward and Patient's Residence | Offline: Face-to-face  Online: WeChat Consultation |
| Importance: 1 2 3 4 5 | | | | | Clinical usability: Yes No | | | |
| Supplementary Suggestions: | | | | | | | | |
| Modification suggestion: | | | | | | | | |
| The core symptom cluster (The fatigue-pain-sleep disturbance symptom cluster) | Follow-up Tracking | 21 | Chemotherapy Interval | Through WeChat follow-ups, maintaining contact with patients is vital for evaluating symptoms management effectiveness. This involves guiding, encouraging, and supervising patients to adhere to core symptom cluster management. Encouraging patients to complete the assessment questionnaires and maintain symptom diaries outlined in the Core Symptom Cluster Management Handbook (Patient Edition) within 7 days of chemotherapy completion helps foster habits. Additionally, reinforcing guidance on diet, psychology, exercise, etc., and prompt response to any patient queries via WeChat contribute to effective follow-up. Keeping detailed follow-up records, with a frequency of once per chemotherapy cycle (every 21 days), ensures comprehensive care continuity. | | Researchers | Patient's residence | Online: WeChat |
| Importance: 1 2 3 4 5 | | | | | Clinical usability: Yes No | | | |
| Supplementary Suggestions: | | | | | | | | |
| Modification suggestion: | | | | | | | | |

**This is the end of the second round of Delphi consultation, and thank you once again for your trust and interest in us.**

**Thank you for your selfless dedication and hard work! Wish good health and smooth work!**
